# Supplementary material for: Morphometric traits in the fine-leaved fescues depend on ploidy level: the case of Festuca amethystina L
Source: PeerJ. 2018 Sep 24;6:e5576. doi: 10.7717/peerj.5576 (PMC6160823; doi:10.7717/peerj.5576)
Supplement: Table S1 — We measured the chosen traits of 30 spikelets from each population. Each spikelet was described by four traits: the length of lower glumes (mm) –LLG, the length of upper glumes (mm) –LUG, the length of the lemma (mm) –LL, the length of the palea (mm) –LP. [file peerj-06-5576-s001.xlsx]

## Sheet: Arkusz1
Lower glume [mm]	Upper glume [mm]	Lemma [mm	Palea [mm]	ssp	cytotyp
3.02	2.24	5.45	5.03	F. am	T
3	1.5	4.54	4.5	F. am	T
3.9	2.32	4.23	4.5	F. am	T
3.5	2.5	4.5	3.5	F. am	T
2.5	2.22	4.5	4.33	F. am	T
3.54	2.58	4.38	4.04	F. am	T
3.11	2.54	4.78	4.54	F. am	T
3.35	2.5	4.89	4.47	F. am	T
3.22	2.98	3.5	3.76	F. am	T
3.36	2.95	4.48	4.49	F. am	T
2.5	2.73	4.58	4.49	F. am	T
3.36	2.28	4.5	4.49	F. am	T
3.5	2.6	5	5.3	F. am	T
4.47	2.79	5.43	4.78	F. am	T
4.43	2.48	6.47	5.42	F. am	T
4.36	3.51	4.55	4.5	F. am	T
4.26	2.52	5	5.47	F. am	T
3.5	2.51	5.35	5	F. am	T
4.98	3.46	4.5	4.5	F. am	D
3.5	2.55	4.21	4.5	F. am	D
4.5	3	4.5	3.5	F. am	D
3.48	2.32	5	4.5	F. am	D
3.21	2.24	4.11	3.5	F. am	D
3.22	2.23	4.22	4	F. am	D
2.5	2	4.34	4.47	F. am	D
3.5	2.5	4	3.5	F. am	D
2.5	2	4.69	4	F. am	D
3.53	2.68	4.23	4	F. am	D
3.5	2.5	5.54	4.5	F. am	D
3.5	2.16	4.53	3.5	F. am	D
4	2.5	4.5	2.5	F. am	D
3.5	2.43	4.52	4	F. am	D
3.27	2.27	4	4	F. am	D
3.51	2.53	4.5	4.5	F. am	D
2.51	1.51	3.5	2.5	F. am	D
3.47	2.14	4.22	4.53	F. am	D
3.37	2.11	3.5	3	F. am	D
3.13	2.25	4.32	5.21	F. am	D
3	2.27	4.11	4.22	F. am	D
2.5	2.23	3.5	3.51	F. am	D
3.5	2.11	4.34	3.22	F. am	D
3.14	2.5	4.21	3.51	F. am	D
3.14	2.21	3.5	3.52	F. am	D
3.23	2.34	4.21	3.54	F. am	D
2.5	1.5	3.5	3.53	F. am	D
3	2	5	4.21	F. am	D
2.5	3.5	4.21	4	F. am	D
3	2.49	4	4.43	F. am	D
4.24	3.33	4.54	5.35	F. rich	T
3.54	1.5	5	5.45	F. rich	T
3.5	3	5.32	6.36	F. rich	T
4.54	3.5	5.24	6.22	F. rich	T
3.32	3.35	5.64	5.45	F. rich	T
3.24	5.46	4.47	5.48	F. rich	T
3.5	3	5.32	5.43	F. rich	T
3.24	4.5	5	5.32	F. rich	T
3.46	5.34	3.5	4.32	F. rich	T
5.04	3.33	5	5.32	F. rich	T
3	4.23	5	5	F. rich	T
3.43	4.33	4.23	4.32	F. rich	T
3.68	2.21	4.21	4.54	F. rich	T
4.66	3.24	4.21	4.5	F. rich	T
4.5	3.32	3.5	4.31	F. rich	T
3.55	2.43	5.28	5.22	F. rich	T
3.68	2.22	5.26	5.5	F. rich	T
5.42	4.21	4.22	3	F. rich	T
4.68	3.12	5.47	5.12	F. rich	T
4.69	2.5	5.11	4.5	F. rich	T
4.31	2.5	4.21	3.5	F. rich	T
4.43	2.21	5.21	4	F. rich	T
2.5	4.46	4.5	5	F. rich	T
4.49	2.47	5.93	4.5	F. rich	T
3	2.68	4.04	5.21	F. rich	T
4.32	3.59	4.47	5	F. rich	T
3.38	2.27	4.32	4.5	F. rich	T
4.59	2.37	5.46	5.32	F. rich	T
4.97	3.32	5.24	6	F. rich	T
3.5	3.24	4.5	4.5	F. rich	T
5.53	5.18	4.88	3.1	F. rich	T
5.31	5.1	4.78	2.36	F. rich	T
5.98	5.51	5.19	5.32	F. rich	T
5.59	4.89	4.72	4.57	F. rich	T
5.9	5.26	5.55	2.28	F. rich	T
5.38	5.39	5.09	4.45	F. rich	T
5.31	4.79	4.58	1.5	F. rich	T
5.38	5.16	5.07	2.43	F. rich	T
5.19	4.28	4.58	3.85	F. rich	T
4.93	4.59	3.49	2.95	F. rich	T
5.56	5.21	5.5	3.09	F. rich	T
4.91	4.93	4.19	2.4	F. rich	T
4.91	4.47	4.24	2.34	F. rich	T
5.5	5.52	5.5	4.88	F. rich	T
4.55	4.48	4.22	2.66	F. rich	T
5.59	5.03	4.84	4.12	F. rich	T
6.05	5.53	5.05	4	F. rich	T
5.7	5.24	5.61	3.5	F. rich	T
5.71	4.87	4.28	2.32	F. rich	T
4.96	5.42	4.83	4.65	F. rich	T
5.85	4.76	4.84	3.42	F. rich	T
5.52	5.29	5.12	2.42	F. rich	T
5	4.91	4.7	3.04	F. rich	T
5.52	5.08	5.47	3.55	F. rich	T
5.14	5.43	4.55	3.24	F. rich	T
5.5	5.51	5.27	2.87	F. rich	T
5.44	4.75	4.51	3.02	F. rich	T
5.03	5.82	4.96	4.22	F. rich	T
4.88	5.89	4.64	3.09	F. rich	T
5.63	5.1	4.79	2.2	F. rich	T
4.94	4.94	4.56	3.27	F. rich	T
5.53	5.36	4.9	3.61	F. rich	T
5.37	5.26	4.65	3.14	F. rich	T
5.35	5.25	4.38	4.15	F. rich	T
5.38	4.8	4.44	1.99	F. rich	T
4.95	4.87	4.3	3.57	F. rich	T
4.82	4.64	4.45	3.84	F. rich	T
5.19	5.59	4.64	4.17	F. rich	T
4.88	4.67	4.58	4.46	F. rich	T
5.34	4.77	4.49	3.89	F. rich	T
4.17	4.02	3.62	3.4	F. rich	T
4.84	4.79	3.95	2.41	F. rich	T
3.79	4.17	4.06	3.36	F. rich	T
5.37	4.99	4.85	2.76	F. rich	T
5.42	5.59	5.73	5.29	F. rich	T
4.64	4.4	4.36	2.8	F. rich	T
4.87	4.87	4.07	1.69	F. rich	T
5.07	4.95	4.14	4.07	F. rich	T
5.38	5.26	5.1	5.16	F. rich	T
4.89	4.89	4	1.01	F. rich	T
4.53	4.24	4	2.1	F. rich	T
4.92	4.45	4.51	3.46	F. rich	T
4.5	4.6	3.69	1.89	F. rich	T
5.39	5.28	4.39	3.64	F. rich	T
5.28	4.45	4.4	3.45	F. rich	T
5.29	4.29	4.34	2.82	F. rich	T
5.29	5.77	4.88	3.78	F. rich	T
5.02	4.29	4.07	3.4	F. rich	T
4.91	4.54	4.42	3.58	F. rich	T
4.82	4.9	4.72	2.55	F. rich	T
5.12	5.28	4.74	4.63	F. rich	T
5.52	5.66	5.47	4	F. rich	T
5.38	5.43	4.6	3.39	F. rich	T
4.56	4.18	3.83	2.08	F. rich	T
5.4	4.87	4.72	3.43	F. rich	T
5.36	4.45	4.67	2.91	F. rich	T
3.34	3.5	4.35	4.37	F. or	D
4.33	3.33	4.36	4.5	F. or	D
3.33	4.34	4.35	4.5	F. or	D
3.5	3.33	4.33	4	F. or	D
3.33	3.5	4.5	4.33	F. or	D
4.34	3.33	5.33	5.35	F. or	D
3.5	3.5	4.43	4.5	F. or	D
4.5	3.5	4.64	4	F. or	D
3.45	3.5	4.33	3.5	F. or	D
3	3.35	4.34	4.33	F. or	D
3.5	3.5	4.45	3.5	F. or	D
3.33	3.33	4.34	4.33	F. or	D
3.5	3.46	4.33	4.33	F. or	D
3	3.54	4.43	4	F. or	D
4.5	4.53	4.53	3.5	F. or	D
3.35	3.53	4.5	4.5	F. or	D
3.56	3.53	4.5	4.5	F. or	D
3.5	3.53	4	3.5	F. or	D
3.33	3.53	4.5	4	F. or	D
3.5	3.53	3.5	4.33	F. or	D
3.33	3.5	3.65	3.33	F. or	D
3.54	3.33	3.35	3.33	F. or	D
3.33	3.46	3.43	3.33	F. or	D
3.33	3.33	4.35	3.5	F. or	D
3.43	3.35	4.33	4.34	F. or	D
3.33	3.33	3.5	3.33	F. or	D
4.56	3.5	4.53	4.33	F. or	D
4.46	3.43	5.33	4.5	F. or	D
4.33	3.33	5.33	4	F. or	D
3.34	2.5	4.35	4.37	F. or	D
4.11	3.32	4.26	4.5	F. or	D
3.13	4.24	4.25	4.5	F. or	D
2.5	3.21	4.13	4	F. or	D
3.22	2.5	4.5	4.23	F. or	D
4.34	3.22	5.31	5.35	F. or	D
3.5	2.5	4.43	4.5	F. or	D
4.5	3.5	4.64	4	F. or	D
3.45	2.5	4.32	3.5	F. or	D
3	2.25	4.24	4.22	F. or	D
3.5	2.5	4.45	3.5	F. or	D
3.23	2.21	4.34	4.23	F. or	D
3.5	2.46	4.22	4.23	F. or	D
3	2.54	4.42	4	F. or	D
4.5	4.53	4.52	2.5	F. or	D
3.35	2.52	4.5	4.5	F. or	D
3.56	3.52	4.5	4.5	F. or	D
3.5	2.52	4	3.5	F. or	D
3.21	2.51	4.5	4	F. or	D
3.5	2.53	3.5	4.33	F. or	D
2.32	2.5	3.65	3.11	F. or	D
3.54	2.32	3.35	3.33	F. or	D
3.12	3.46	3.43	3.22	F. or	D
3.23	2.23	4.35	3.5	F. or	D
3.43	2.35	4.32	4.34	F. or	D
3.32	2.21	3.5	3.21	F. or	D
4.56	3.5	4.51	4.32	F. or	D
4.46	3.42	5.12	4.5	F. or	D
4.21	3.22	5.11	4	F. or	D
6.7	6.15	3.55	3.35	F. or	D
6.62	6.7	6.32	3.67	F. or	D
6.51	6.49	4.94	3.63	F. or	D
6.46	6.61	3.45	2.24	F. or	D
4.81	4.34	3.33	2.25	F. or	D
4.68	4.45	4.24	2.31	F. or	D
4.56	3.94	4.01	3.03	F. or	D
4.49	4.53	3.87	2.95	F. or	D
4.47	4.46	3.44	2.35	F. or	D
4.42	4.45	4.39	3.7	F. or	D
4.39	4.2	3.77	2.49	F. or	D
4.36	3.91	3.79	2.22	F. or	D
4.35	4.23	3.56	2.88	F. or	D
4.34	3.76	4.01	2.99	F. or	D
4.33	4.25	3.17	2.83	F. or	D
4.33	4.43	3.65	2.26	F. or	D
4.31	3.68	2.92	2.28	F. or	D
4.31	4	3.85	3.2	F. or	D
4.28	4.43	3.69	2.27	F. or	D
4.26	4.46	4.44	3.07	F. or	D
4.22	4.11	4.14	3.01	F. or	D
4.13	4.33	3.39	2.15	F. or	D
4.12	3.76	3.26	2.67	F. or	D
4.12	3.48	3.47	2.23	F. or	D
4.12	3.7	3.08	3.01	F. or	D
4.12	4.23	3.94	3.46	F. or	D
4.11	4	3.61	1.28	F. or	D
4.11	4.26	3.98	3.32	F. or	D
4	3.33	2.56	1.66	F. or	D
3.99	4.28	3.37	2.29	F. or	D
3.93	3.41	3.58	2	F. or	D
3.9	3.57	2.58	1.46	F. or	D
3	3.02	2.36	1.02	F. or	D
2.99	2.29	2.08	1.74	F. or	D
2.96	2.8	3.02	2.21	F. or	D
2.86	2.77	2.63	2.26	F. or	D
2.75	3.05	2.67	2.26	F. or	D
2.68	2.24	2.49	2.14	F. or	D
2.57	2.41	2.68	2.26	F. or	D
2.53	2.05	2.24	2.15	F. or	D
3.48	2.53	4.23	4.32	F. or	T
3.5	2.52	4.34	4.5	F. or	T
3.5	2.55	4.52	4.5	F. or	T
3	3.58	4.5	4	F. or	T
3.5	2.97	4.53	4.5	F. or	T
3	3.72	4.5	4.32	F. or	T
3.45	2.57	4.53	4	F. or	T
4.58	3.47	5.11	6.11	F. or	T
4.33	3.5	6.11	6.23	F. or	T
3.51	3.5	6.11	6.5	F. or	T
4.44	2.5	5.68	4	F. or	T
4.37	3.55	5.58	5.5	F. or	T
4.33	3.79	5.36	5.5	F. or	T
4.48	3.79	5.33	5	F. or	T
4.38	2.5	4	4	F. or	T
4.36	3	4	3.5	F. or	T
4.06	2.5	4.5	4	F. or	T
4.57	2.5	4.5	4.67	F. or	T
4.46	3.5	4.32	5.32	F. or	T
4.36	3	5	5.5	F. or	T
4.5	3.5	3.36	5	F. or	T
3.62	2.87	4.36	3	F. or	T
4.56	3.33	4.5	5.5	F. or	T
3.36	2.5	4.5	4.5	F. or	T
4.5	2.52	4.35	4	F. or	T
4.35	4.35	5.32	4	F. or	T
4.96	3.5	4	4.56	F. or	T
4.52	3.33	4.5	4.57	F. or	T
4.58	2.51	5	5	F. or	T
4.64	3.52	4.5	5.5	F. or	T
4.55	3.5	5.68	6	F. or	T
4.53	2.55	5.47	5	F. or	T
4.32	3.78	5.78	5	F. or	T
5.53	3	5	5	F. or	T
4.5	2.5	5.5	5.5	F. or	T
5	2.5	6	6.5	F. or	T
4.5	3.5	6	6	F. or	T
5.23	3.5	5.5	5.5	F. or	T
4	2.5	4.5	5	F. or	T
3.37	2.78	4.65	4.5	F. or	T
3	2.53	4.46	4.5	F. or	T
4.5	3.69	5.1	5	F. or	T
4.52	3.5	5.5	6.21	F. or	T
4.45	3.5	5.23	6.11	F. or	T
4.5	3	5.36	5.89	F. or	T
3.32	2.51	4.5	4.5	F. or	T
3.5	2.52	4.5	5.46	F. or	T
3.5	2.51	4.5	5.5	F. or	T
3.5	2.89	5.46	5.43	F. or	T
4.35	2.86	5.56	5.89	F. or	T
4.36	3	5.25	5.45	F. or	T
4.57	3.67	5.68	5	F. or	T
4.42	3.86	5.58	4.5	F. or	T
4.58	3.5	4.87	4	F. or	T
4.43	2.58	4.5	4.5	F. or	T
4.69	3.47	4.5	5	F. or	T
4.32	3.57	5	4.5	F. or	T
4.12	3.47	4.5	5.57	F. or	T
4.33	3.5	5.42	5.26	F. or	T
3.5	2.5	5.47	5.57	F. or	T
4.59	3.89	4.5	5	F. or	T
5.36	5.55	5.17	3.74	F.am	T
5.76	5.53	4.92	4.74	F.am	T
5.63	5.36	4.76	4.15	F.am	T
5.8	5.35	4.9	4.32	F.am	T
5.71	5.57	4.85	3.27	F.am	T
5.1	4.95	5.14	4.67	F.am	T
5.56	5.47	4.96	4.1	F.am	T
5.6	5.5	4.86	4.34	F.am	T
5.48	5	4.56	2.19	F.am	T
6.12	5.81	4.86	4.5	F.am	T
5.73	5.61	4.93	4.32	F.am	T
6.15	5.46	4.97	4.31	F.am	T
5.7	5.3	5.55	5.12	F.am	T
5.45	5.12	4.96	4.38	F.am	T
5.79	5.55	5.16	4.37	F.am	T
5.71	5.62	5.18	4.72	F.am	T
5.39	5.47	4.6	4	F.am	T
5.56	5.4	4.93	4.05	F.am	T
5.48	5.15	4.58	3.8	F.am	T
5.97	5.37	4.61	4.42	F.am	T
5.47	5.14	4.46	1.88	F.am	T
5.55	5.27	5.06	4.25	F.am	T
5.23	4.53	5.23	4.77	F.am	T
5.38	5.09	4.59	4.01	F.am	T
5.96	5.67	4.59	4.59	F.am	T
6.02	5.41	4.93	3.7	F.am	T
5.72	5.45	5.15	4.4	F.am	T
5.61	5.84	4.86	3.21	F.am	T
5.87	5.19	4.48	2.76	F.am	T
5.33	4.75	4.1	4.06	F.am	T
5.42	5.32	5.19	3.44	F.am	T
5.82	4.95	4.34	1.59	F.am	T
5.66	5.4	5.16	3.91	F.am	T
5.59	5.39	4.98	3.53	F.am	T
6.37	5.48	4.92	2.73	F.am	T
6.54	6.13	5.07	3.56	F.am	T
5.15	5.14	4.54	2.38	F.am	T
5.3	5.42	4.92	4.48	F.am	T
4.56	4.42	4.21	2.23	F.am	T
5.83	5.25	5.04	2.65	F.am	T
5.02	4.92	4.81	4.16	F.am	T
4.96	4.67	4.38	3.67	F.am	T
5.21	5.18	5.09	4.28	F.am	T
5.79	5.43	4.94	4.87	F.am	T
5	4.89	4.97	4.05	F.am	T
4.89	5	4.7	3.88	F.am	T
5.31	5.3	5.11	4.64	F.am	T
5.14	4.66	4.88	4.33	F.am	T
4.98	5.07	4.31	3.31	F.am	T
5.22	5.08	4.75	4.74	F.am	T
5.3	5.17	5.09	4.42	F.am	T
4.91	4.63	4.54	4.21	F.am	T
5.52	5.28	4.93	4.73	F.am	T
4.89	5	5.05	4.68	F.am	T
4.7	4.52	4.27	2.73	F.am	T
5.06	5.07	4.18	4.18	F.am	T
5.06	4.92	4.71	4.58	F.am	T
4.76	4.8	5.03	4.01	F.am	T
4.81	4.82	4.4	3.94	F.am	T
5.25	5.11	4.48	4.23	F.am	T
5.35	5	4.85	4.57	F.am	T
5.11	5.13	4.62	3.86	F.am	T
5.73	5.1	4.8	4.57	F.am	T
5.17	5.04	4.58	4.17	F.am	T
5.34	4.93	4.8	4.59	F.am	T
4.87	4.39	4.66	3.83	F.am	T
5.25	4.8	4.56	4.33	F.am	T
5.34	4.97	4.94	4.72	F.am	T
4.64	4.58	4.09	2.5	F.am	T
6.18	5.73	4.61	3.55	F.am	T
4.65	3.11	3.5	3	F. or	D
4.32	3.23	5	4.42	F. or	D
4.42	3.24	3.24	3.5	F. or	D
4.24	3.35	4.44	4.12	F. or	D
3.46	2.57	3.5	4.24	F. or	D
3.31	2.53	4.27	4.26	F. or	D
3.08	2.42	3.5	3.5	F. or	D
4.36	2.5	4.35	5	F. or	D
4.36	3.25	3.5	3.5	F. or	D
3.37	2.44	4.43	4.32	F. or	D
4.21	3.32	4.21	4.5	F. or	D
4.5	3.97	4.21	4	F. or	D
3.33	4	4.35	4	F. or	D
3.33	2.35	4.22	4	F. or	D
3.23	2.21	4.36	3.5	F. or	D
3.46	2.8	4.33	4.23	F. or	D
3.23	2.24	4.5	4.33	F. or	D
3.52	3.35	4.43	4.45	F. or	D
